# Supplementary material
Source: PubMed Central journal article supplement (PMC527199)

**Figure S1. Characterisation of *aux1* allelic series using AUX1 western immuno-detection**

10 µg microsomal protein was separated by SDS-PAGE, blotted and probed with the anti-AUX1 peptide antiserum. Blots were stripped then reprobed with antisera raised against tobacco plasma membrane ATPase2 (PMA<sub>2</sub>) to obtain a protein loading control (bottom panels).

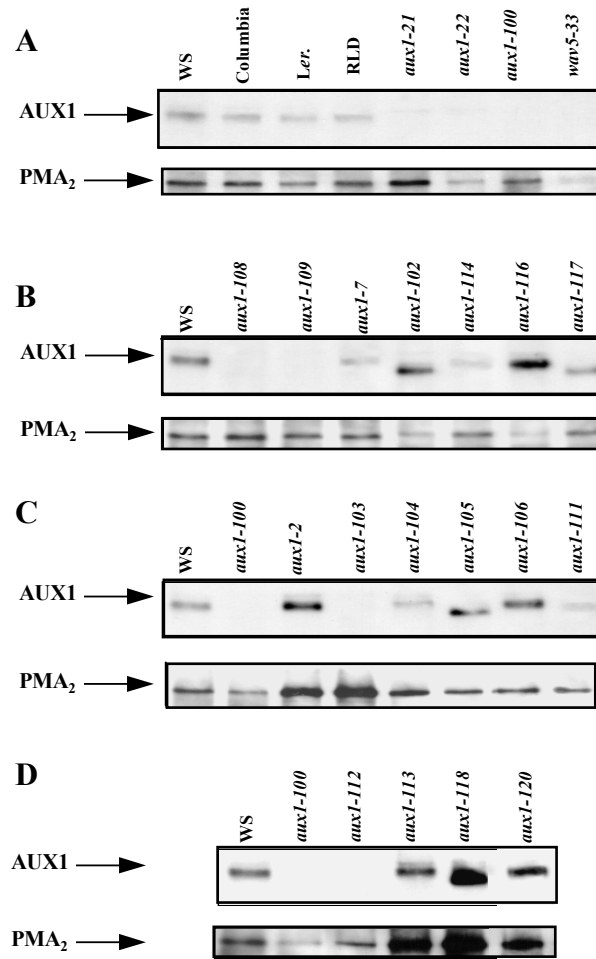

Supplement: plntcell_tpc.104.024737_1.pdf [file plntcell_tpc.104.024737_1.pdf]
