# Supplementary material
Source: PubMed Central journal article supplement (PMC527199)

**Swarup *et al.***

**Figure S3. HA-AUX1-7 localisation is identical to HA-AUX1**

- A. Immunolocalisation of HA-AUX1 in the root apex using confocal microscopy.  
B. Immunolocalisation of HA-AUX1-7 in the root apex using confocal microscopy.

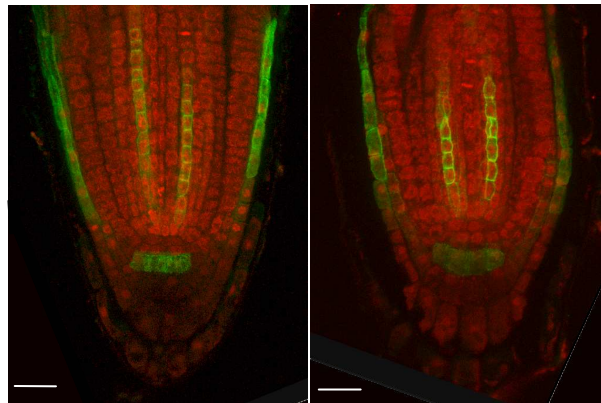

Supplement: plntcell_tpc.104.024737_3.pdf [file plntcell_tpc.104.024737_3.pdf]
