# Supplementary material
Source: PubMed Central journal article supplement (PMC527199)

**Swarup *et al.***

**Figure S2. Root elongation bioassays in presence of  $10^{-7}$  M 2,4-D**

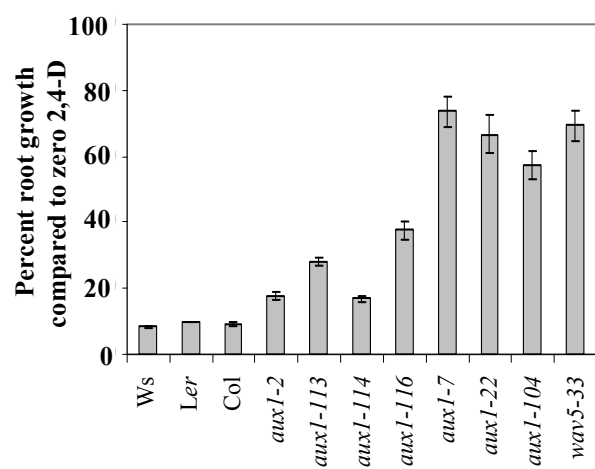

Supplement: plntcell_tpc.104.024737_2.pdf [file plntcell_tpc.104.024737_2.pdf]
